# Supplementary material for: Hybrid silica nanoparticles traceable by fluorescence and FT-IR spectroscopy: preparation, characterization and preliminary biological studies
Source: Royal Society of Chemistry journal article supplement (doi:10.1039/c1jm11555c), 2011-01-01
Supplement: c1jm11555c.pdf [file c1jm11555c.pdf]

Supplementary Information: *Journal of Materials Chemistry*

Title: Hybrid Silica Nanoparticles Traceable by Fluorescence and FT-IR Spectroscopy: Preparation, Characterization, and Preliminary Biological Studies

Maria Alesker, Adi Heller, Zvi Malik, Igor Makarovskiy, and Jean-Paul Lellouche

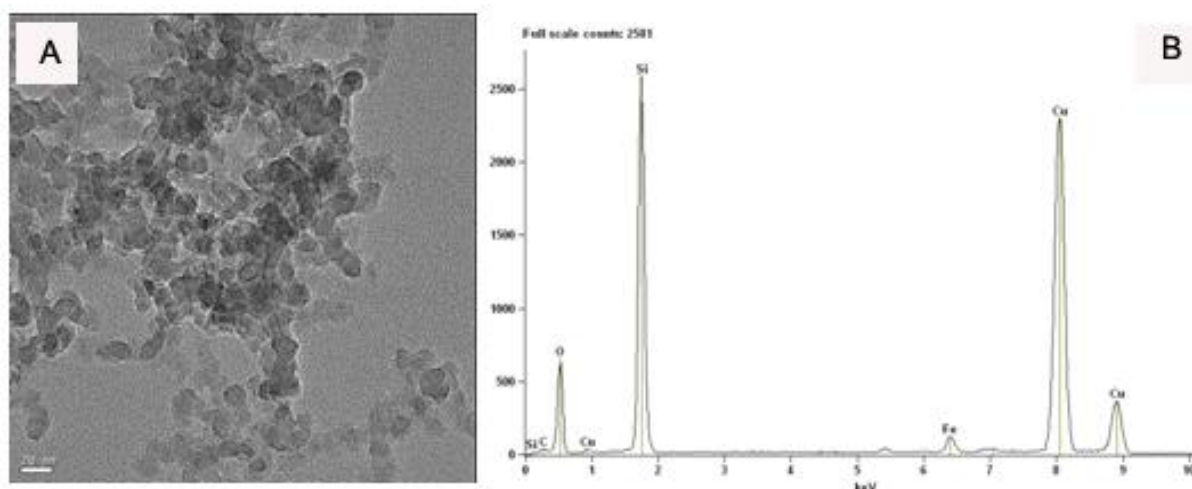

**Figure S1.** HR-TEM EDC analysis data of SiO<sub>2</sub>@DIT-tag<sub>60</sub> NPs

| <i>Element Line</i> | <i>Weight %</i> | <i>Weight % Error</i> | <i>Atom %</i> |
|---------------------|-----------------|-----------------------|---------------|
| <i>C K</i>          | 7.58            | +/- 0.83              | 13.73         |
| <i>O K</i>          | 28.06           | +/- 0.68              | 38.17         |
| <i>Si K</i>         | 59.73           | +/- 0.43              | 46.29         |
| <i>Fe K</i>         | 4.64            | +/- 0.27              | 1.81          |

**Table S1.** EDC analysis data of SiO<sub>2</sub>@DIT-tag<sub>60</sub> NPs

|                                             | Atomic concentration % |      |       |       |        |
|---------------------------------------------|------------------------|------|-------|-------|--------|
|                                             | Fe 2p 3/2              | N 1s | C 1s  | Si 2p | Si/Fe  |
| SiO <sub>2</sub> @DIT-tag <sub>20</sub> NPs | 0.24                   | 1.06 | 48.71 | 49.99 | 208.29 |
| SiO <sub>2</sub> @DIT-tag <sub>60</sub> NPs | 1.14                   | 3.24 | 39.88 | 55.74 | 48.89  |

**Table S2.** Quantification report of an XPS analysis on SiO<sub>2</sub>@DIT-tag<sub>20/60</sub> NPs

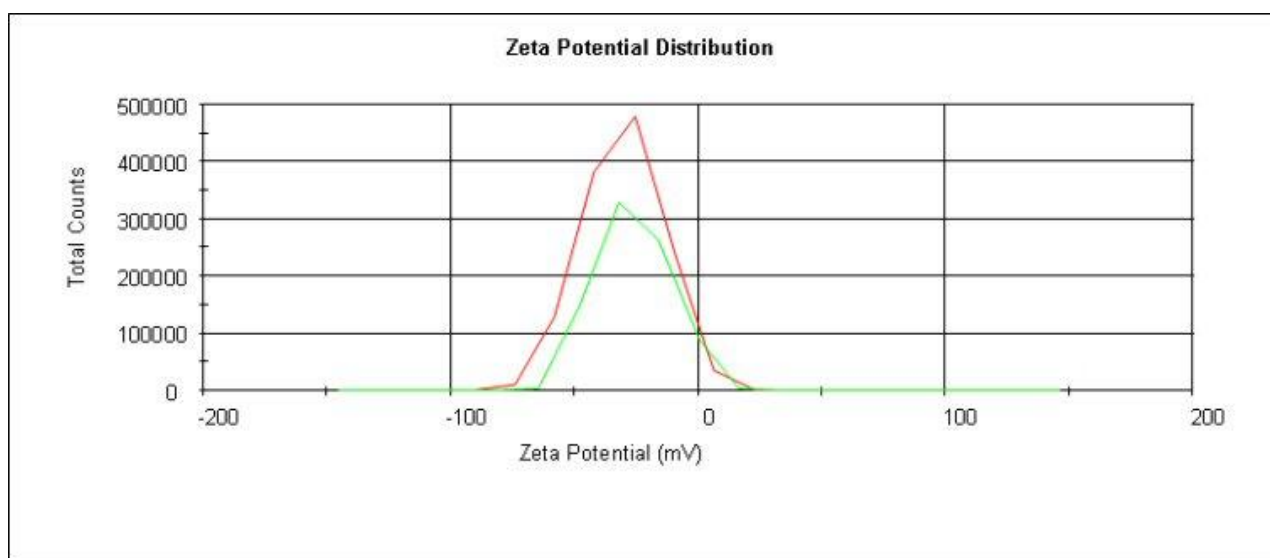

**Figure S2.**  $\xi$  potential distributions of SiO<sub>2</sub>@DIT-tag<sub>20/60</sub> NPs (1 mg NPs/mL of EtOH) are -30.1 mV (*red curve*) and -26.1 mV (*green curve*), respectively.

|                                                   | Atomic concentration % |      |       |       |       |
|---------------------------------------------------|------------------------|------|-------|-------|-------|
|                                                   | Fe 2p 3/2              | N 1s | C 1s  | Si 2p | Si/Fe |
| SiO <sub>2</sub> @DIT-tag <sub>20</sub> @FITC NPs | 0.83                   | 1.81 | 57.88 | 39.48 | 47.57 |

**Table S3.** Quantification report of an XPS analysis of SiO<sub>2</sub>@DIT-tag<sub>20</sub>@FITC NPs

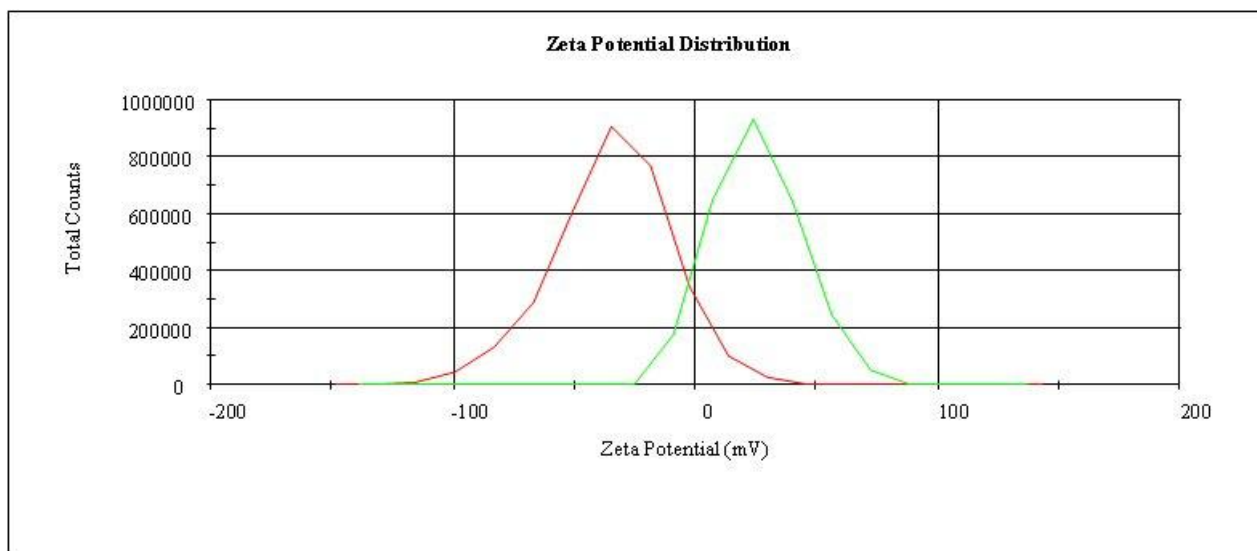

**Figure S3.**  $\zeta$  potential distributions of  $\text{SiO}_2$ @DIT-tag@FITC NPs (1.0 mg NPs/mL EtOH, red curve, -34.0 mV) and of  $\text{SiO}_2$ @DIT-tag@FITC@ $\text{NH}_2$  NPs (1.0 mg NPs/mL EtOH, green curve, +25.6 mV)

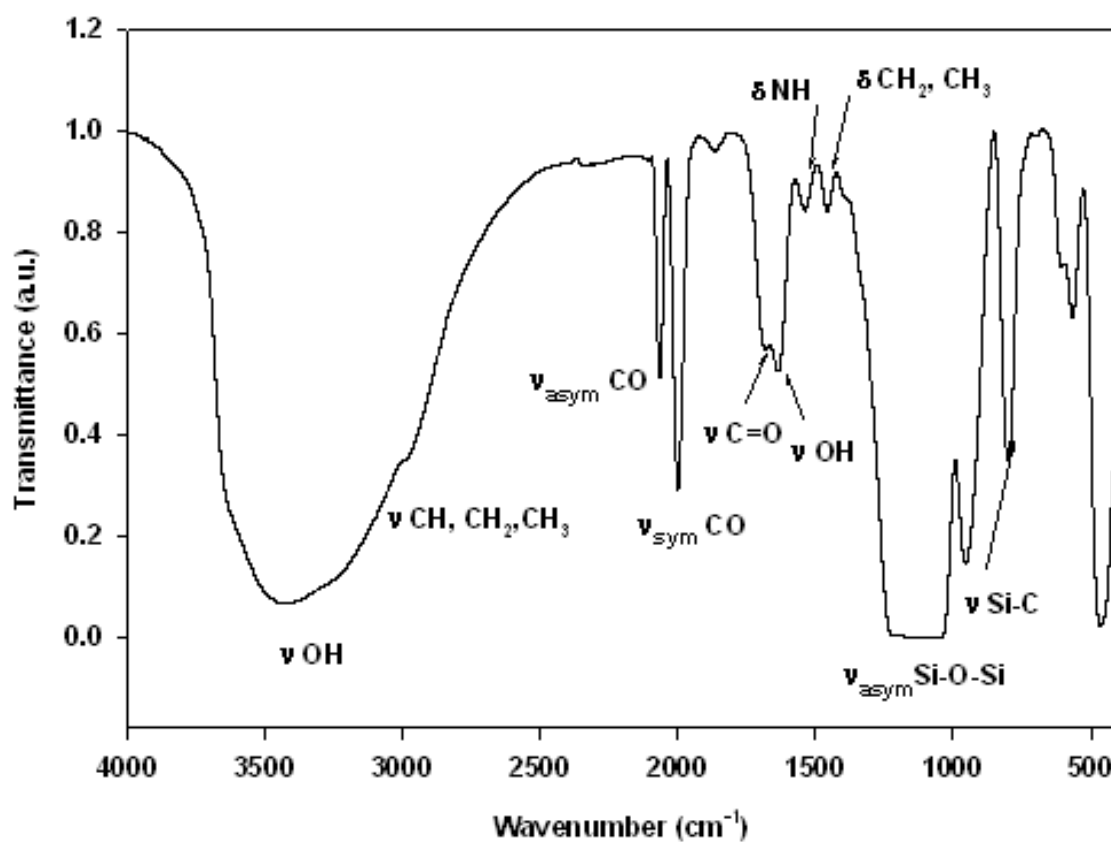

**Figure S4.** FT-IR spectrum and the main vibrational bands of  $\text{SiO}_2$ @DIT-tag@FITC NPs

| <i>Element Line</i> | <i>Atom %</i> | <i>Atom % Error</i> |
|---------------------|---------------|---------------------|
| <i>C K</i>          | 5.65          | +/- 0.49            |
| <i>O K</i>          | 75.25         | +/- 0.54            |
| <i>Si K</i>         | 18.88         | +/- 0.09            |
| <i>Fe K</i>         | 0.22          | +/- 0.03            |
| <i>Total</i>        | 100.00        |                     |

**Table S4.** HR-SEM EDAX analysis data of SiO<sub>2</sub>@DIT-tag<sub>20</sub>@FITC@NH<sub>2</sub> NPs

| <i>Element Line</i> | <i>Atom %</i> |
|---------------------|---------------|
| <i>O K</i>          | 65.28         |
| <i>Si K</i>         | 34.08         |
| <i>Cl K</i>         | 0.14          |
| <i>Fe K</i>         | 0.51          |
| <i>Total</i>        | 100.00        |

**Table S5.** HR-TEM EDC analysis data of SiO<sub>2</sub>@DIT-tag<sub>20</sub>@FITC@NH<sub>2</sub> NPs

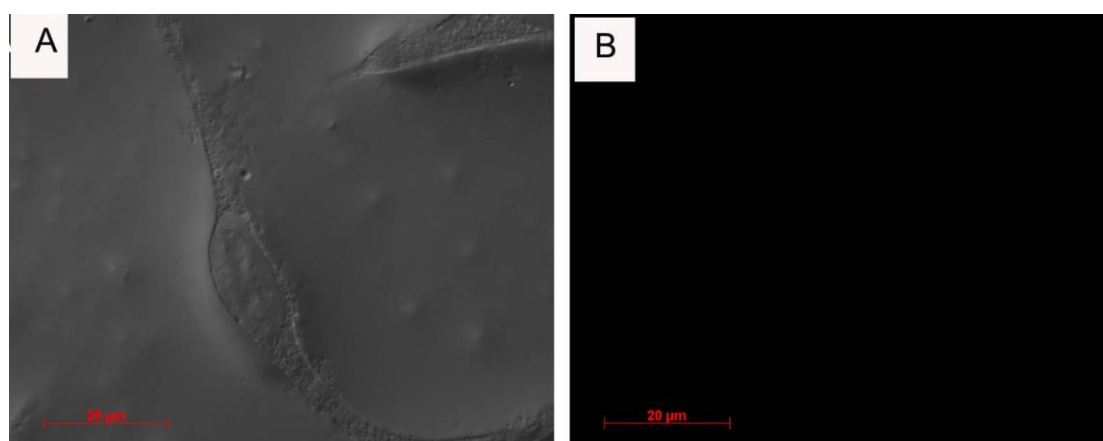

**Figure S5.** Fluorescence (A) and DIC photomicrographs (B) of the negative control of B16 cells (*without* NPs)

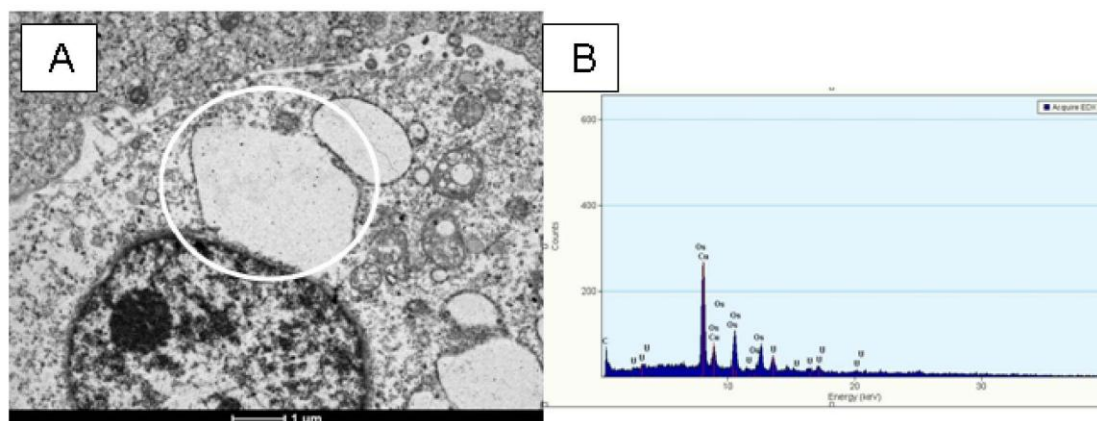

**Figure S6.** A: TEM photomicrograph of negative control B16 cells (*without* NPs). The white circle depicts the area upon which the EDS analysis was acquired from vacuoles; B: EDS spectrum demonstrated only elements that were used in cell fixation (Os) and staining (U)

| Entry            | FT-IR Absorbance $\nu_{\text{FeC}\equiv\text{O}}$<br>[2063.3 & 1996.5 $\text{cm}^{-1}$ ] (a.u.) |
|------------------|-------------------------------------------------------------------------------------------------|
| <b>Control 1</b> | 0.258800.15750 &                                                                                |
| <b>1</b>         | 0.16758 0.10053 &                                                                               |
| <b>2</b>         | 0.167580.10053 &                                                                                |
| <b>3</b>         | 0.167580.09900 &                                                                                |
| <b>4</b>         | 0.157230.10282 &                                                                                |
| <b>5</b>         | 0.10086 0.06842 &                                                                               |
| <b>6</b>         | 0.041620.03832 &                                                                                |
| <b>7</b>         | 0.026720.02256 &                                                                                |
| <b>8</b>         | 0.015620.01568 &                                                                                |
| <b>9</b>         | 0.009790.01492 &                                                                                |
| <b>10</b>        | 0.0054180.004874 &                                                                              |
| <b>11</b>        | 0.004540.004795 &                                                                               |
| <b>12</b>        | 0.003530.003554 &                                                                               |
| <b>Control 2</b> | -                                                                                               |

**Table S6.** Absorbance values (a.u.) of FT-IR sensitivity experiments

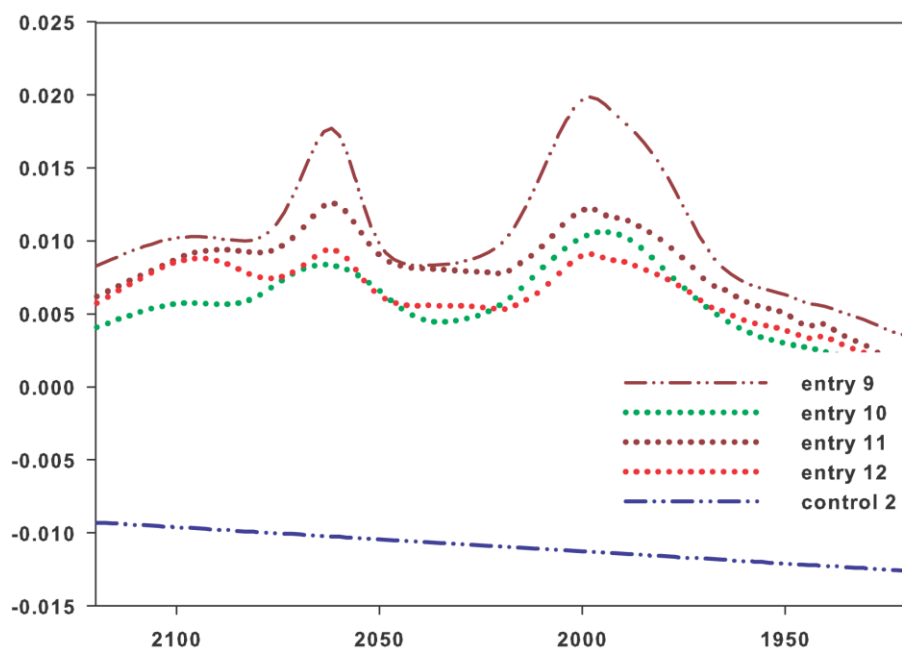

**Figure S7.** Magnified superimposed FT-IR signals (x 5) to entries 9-12 and Control 2 are in Table 1

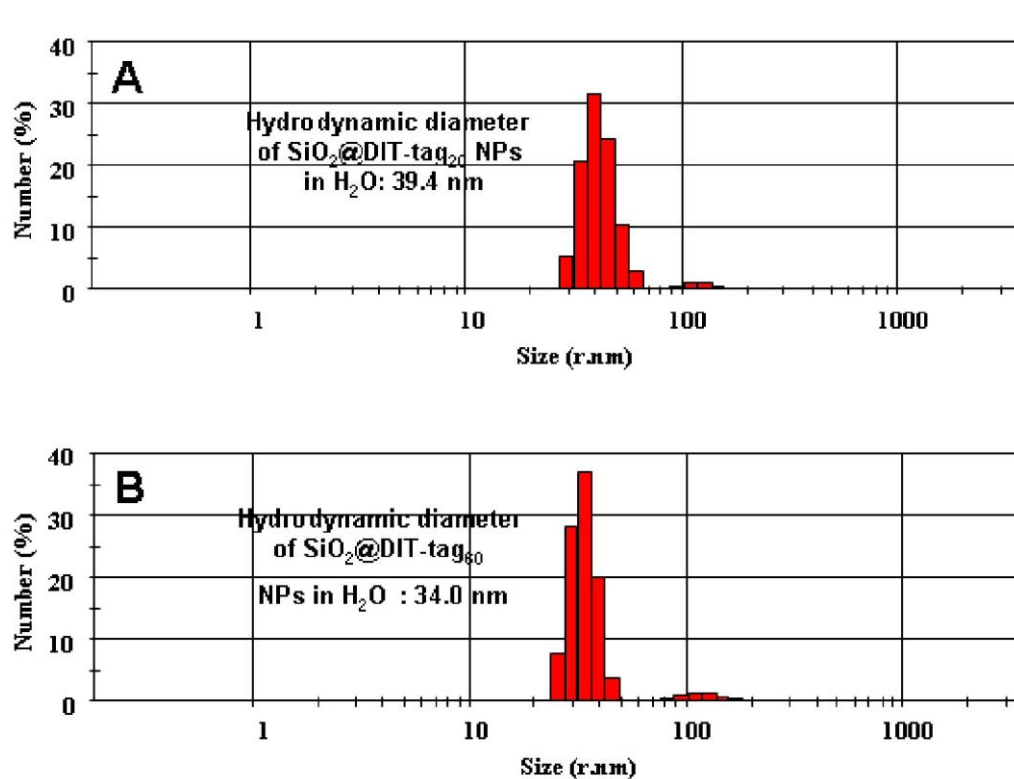

**Figure S8.** DLS-measured diameter histograms of SiO<sub>2</sub>@DIT-tag<sub>20</sub> (A) and SiO<sub>2</sub>@DIT-tag<sub>60</sub> NPs (B) in H<sub>2</sub>O (1.0 mg NPs/mL)

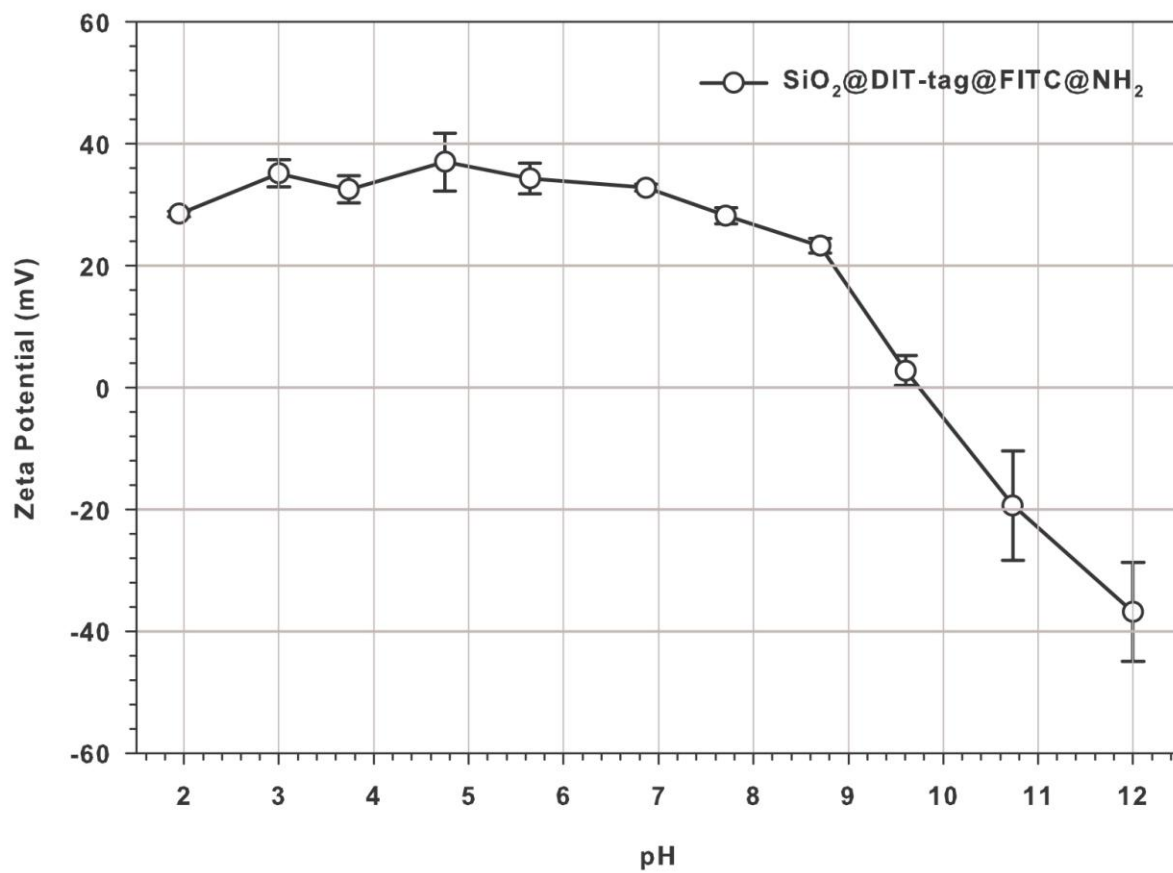

**Figure S9.** pH dependency of the colloidal stability of SiO<sub>2</sub>@DIT-tag@FITC@NH<sub>2</sub> NPs in neutral H<sub>2</sub>O (2.0 mg NPs/mL H<sub>2</sub>O) - Acidic-base titration experiment

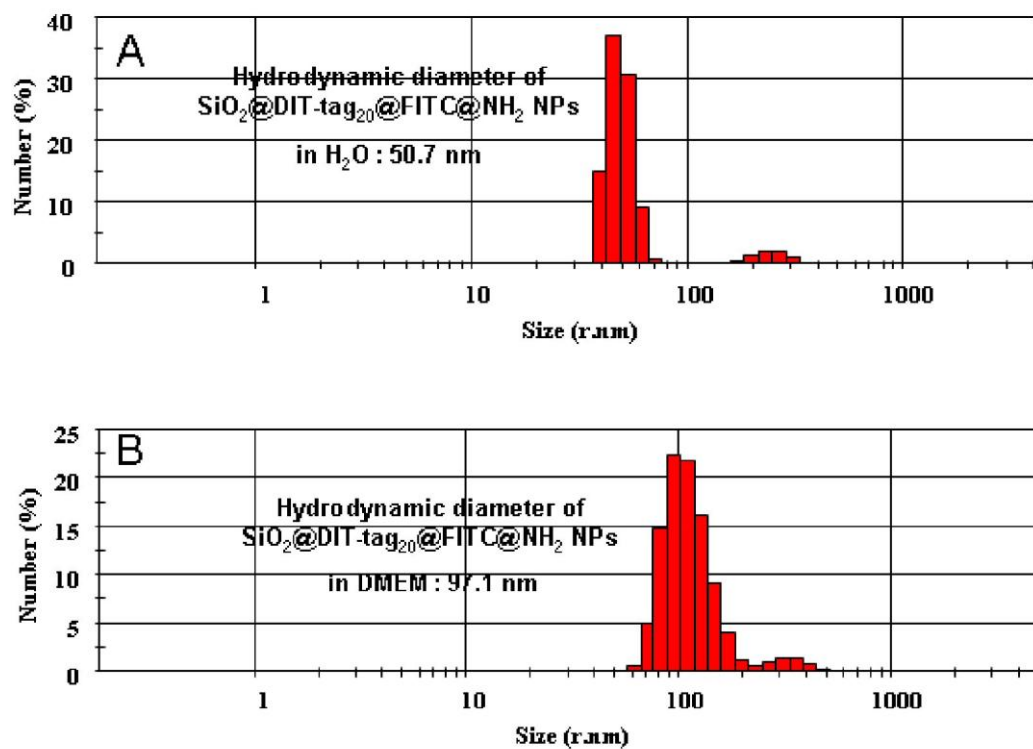

**Figure S10.** A & B: DLS histograms of  $\text{SiO}_2@DIT\text{-tag}_{20}@FITC@NH_2$  NPs in the  $\text{H}_2\text{O}$  and DMEM containing 10% fetal bovine serum (FBS), respectively. The hydrodynamic diameter of NP in water was measured to be 50.7 nm and in DMEM 97.1 nm, respectively.
